# Supplementary material for: Effect of Diatomite on the Thermal Degradation Behavior of Polypropylene and Formation of Graphene Products
Source: MDPI journal article supplement (doi:10.3390/polym14183764), 2022-09-08
Supplement: s1 [file s1]

# Effect of diatomite on the thermal degradation behavior of polypropylene and formation of graphene products

Yankun Chen <sup>1</sup> and Biao Wang <sup>1,\*</sup>

<sup>1</sup> State Key Laboratory for Modification of Chemical Fibers and Polymer Materials, College of Materials Science and Engineering, Donghua University, Shanghai 201620, China.

\*Corresponding author: Biao Wang, E-mail: wbiao2000@dhu.edu.cn

## Results and discussions Section

**Table S1.** The normalized peak areas of the evolved products during thermal degradation of pure PP and DM-20/PP samples according to the Figure 4.

| Pyrolysis products            | Molecular Formula | PP sample (area%) <sup>1</sup> | DM-20/PP sample (area%) <sup>1</sup> |
|-------------------------------|-------------------|--------------------------------|--------------------------------------|
| Propylene                     | C3H6              | 28.72                          | 24.56                                |
| 2-Methyl-Propene              | C4H8              | 14.86                          | 13.19                                |
| 1,3-Pentadiene                | C5H8              | 10.59                          | 8.86                                 |
| 1-Pentene                     | C5H10             | 9.31                           | 11.35                                |
| 2-Methyl-1,4-pentadiene       | C6H10             | 2.00                           | 2.06                                 |
| trans-2-Methyl-1,3-pentadiene | C6H10             | 1.40                           | 1.59                                 |
| 1-Hexene                      | C6H12             | 10.05                          | 8.60                                 |
| 1,3,5-Cycloheptatriene        | C7H8              | 1.67                           | -                                    |
| 2-Methyl-1,5-hexadiene        | C7H12             | 1.08                           | 1.26                                 |
| 2,4-Dimethyl-1-pentene        | C7H14             | 1.46                           | 1.48                                 |
| 1,3-Dimethylbenzene           | C8H10             | 0.89                           | -                                    |
| 2,5-Dimethyl-1,5-hexadiene    | C8H14             | 2.16                           | 2.58                                 |
| 2-Methyl-1-heptene            | C8H16             | 0.87                           | -                                    |
| 1,7-Nonadiene                 | C9H16             | -                              | 0.48                                 |
| 2,4-Dimethyl-1-heptene        | C9H18             | 8.70                           | 11.41                                |
| 1-Decanol                     | C10H22O           | 0.34                           | 1.54                                 |
| 2-Decene                      | C10H20            | 0.31                           | 1.44                                 |
| 4-Methyl-2-decene             | C11H22            | 1.51                           | 1.94                                 |
| 1-Dodecanol                   | C12H26O           | 0.46                           | 1.53                                 |
| 7-Methyl-1-undecene           | C12H24            | 1.07                           | 1.64                                 |

---

---

|                                     |        |      |      |
|-------------------------------------|--------|------|------|
| 4-Tetradecene                       | C14H28 | 0.30 | 1.42 |
| 4-Isopropyl-1,7-dimethylcyclodecane | C15H30 | 0.33 | -    |
| 3-Eicosene                          | C20H40 | 1.92 | 3.07 |

---

<sup>1</sup> Calculated by GC-MS.
